# Supplementary material
Source: PubMed Central journal article supplement (PMC3174787)
Supplement: supp_japplphysiol.00458.2011_tableS1-S4.pdf [file supp_japplphysiol.00458.2011_tableS1-S4.pdf]

1 **Table S1. Population parameters for network model with adjusted ( $\Delta$ ) and additional (+) neuronal populations modified from Rybak et**  
 2 **al. 2008.**  
 3

| Population name                      | Size | Resting threshold (mV)                     | THO variability (mV) | Membrane time constant | Post-spike increase in $G_{K+}$ | Post-spike $G_{K+}$ time constant (ms) | Adaptation threshold increase | Adaptation (ms) | Noise amplitude | DC (mV) |
|--------------------------------------|------|--------------------------------------------|----------------------|------------------------|---------------------------------|----------------------------------------|-------------------------------|-----------------|-----------------|---------|
|                                      | $N$  | $THO$                                      |                      | $TMEM$                 | $B$                             | $TGK$                                  | $C$                           | $TTH$           |                 |         |
| PRG I                                | 100  | 10.0                                       | 1.0                  | 9.0                    | 20.0                            | 7.0                                    | 0.0                           | 500.0           | 0.03            | 2.0     |
| PRG rIE                              | 100  | 10.0                                       | 1.0                  | 9.0                    | 20.0                            | 7.0                                    | 0.0                           | 500.0           | 0.3             | 5.0     |
| PRG cIE                              | 100  | 10.0                                       | 1.0                  | 9.0                    | 20.0                            | 7.0                                    | 0.0                           | 500.0           | 0.3             | 5.0     |
| PRG E                                | 100  | 10.0                                       | 1.0                  | 9.0                    | 20.0                            | 7.0                                    | 0.0                           | 500.0           | 0.3             | 13.0    |
| PRG EI                               | 100  | 10.0                                       | 1.0                  | 9.0                    | 20.0                            | 7.0                                    | 0.0                           | 500.0           | 0.3             | 20.0    |
| PRG NRM                              | 100  | 10.0                                       | 1.0                  | 9.0                    | 20.0                            | 7.0                                    | 0.0                           | 500.0           | 0.03            | 25.0    |
| VRC NRM                              | 300  | 10.0                                       | 1.0                  | 9.0                    | 20.0                            | 7.0                                    | 0.0                           | 500.0           | 0.03            | 25.0    |
| I-DRIVER                             | 300  | see Table 2 for I-Driver neuron parameters |                      |                        |                                 |                                        |                               |                 |                 |         |
| $\Delta$ I-DEC                       | 300  | 10.0                                       | 1.0                  | 6.0                    | 25.5                            | 6.63                                   | 0.63                          | 1000.0          | 0.3             | 36.0    |
| I-AUG                                | 300  | 10.0                                       | 1.0                  | 6.0                    | 25.0                            | 3.8                                    | 0.0                           | 5000.0          | 0.5             | 8.0     |
| VRC IE                               | 99   | 10.0                                       | 1.0                  | 9.0                    | 5.6                             | 5.0                                    | 0.0                           | 1000.0          | 0.054           | 12.0    |
| $\Delta$ E-DEC-P                     | 300  | 8.0                                        | 1.0                  | 9.0                    | 27.0                            | 2.5                                    | 0.7                           | 1200.0          | 0.1             | 18.0    |
| E-DEC-T                              | 300  | 8.0                                        | 1.0                  | 9.0                    | 27.0                            | 2.5                                    | 0.8                           | 2000.0          | 0.3             | 0.0     |
| E-AUG-early                          | 300  | 10.0                                       | 1.0                  | 6.0                    | 27.0                            | 2.5                                    | 0.0                           | 500.0           | 0.3             | 30.0    |
| E-AUG-late                           | 300  | 10.0                                       | 1.0                  | 9.0                    | 27.0                            | 2.5                                    | 0.0                           | 500.0           | 0.1             | 27.0    |
| E-AUG-Cough                          | 300  | 10.0                                       | 1.0                  | 9.0                    | 27.0                            | 2.5                                    | 0.0                           | 500.0           | 0.3             | 0.0     |
| E-AUG-BS                             | 300  | 10.0                                       | 1.0                  | 6.0                    | 25.0                            | 3.8                                    | 0.08                          | 500.0           | 0.2             | 5.0     |
| Pump+                                | 300  | 0.0                                        | 0.0                  | 6.0                    | 25.0                            | 3.8                                    | 0.08                          | 500.0           | 0.1             | 0.0     |
| Pump-                                | 300  | 0.0                                        | 0.0                  | 6.0                    | 25.0                            | 3.8                                    | 0.08                          | 500.0           | 0.1             | 0.0     |
| I-AUG-BS/PHR                         | 300  | 10.0                                       | 1.0                  | 6.0                    | 25.0                            | 3.8                                    | 0.08                          | 500.0           | 0.3             | 5.0     |
| $\Delta$ Lum (Exp MN)                | 300  | 10.0                                       | 1.0                  | 6.0                    | 25.0                            | 3.8                                    | 0.08                          | 500.0           | 0.2             | 4.0     |
| $\Delta$ ILM                         | 300  | 10.0                                       | 1.0                  | 6.0                    | 25.0                            | 3.8                                    | 0.08                          | 500.0           | 0.1             | 0.0     |
| + E-DEC-Pre                          | 300  | 8.0                                        | 1.0                  | 9.0                    | 27.0                            | 2.5                                    | 0.8                           | 1000.0          | 0.1             | 9.0     |
| $\Delta$ ELM                         | 300  | 10.0                                       | 1.0                  | 6.0                    | 25.0                            | 3.8                                    | 0.08                          | 500.0           | 0.1             | 0.0     |
| + LUNG PSRs                          | 300  | 0.0                                        | 0.0                  | 0.0                    | 25.0                            | 100.0                                  | 0.08                          | 500.0           | 0.1             | 0.0     |
| > Second-order (cough)               | 100  | 10.0                                       | 1.0                  | 9.0                    | 20.0                            | 7.0                                    | 0.3                           | 500.0           | 0.1             | 0.0     |
| + Second-order (deflation sensitive) | 300  | 8.0                                        | 1.0                  | 9.0                    | 27.0                            | 2.5                                    | 0.5                           | 1000.0          | 0.3             | 20.0    |
| > + Baro Raphe 8                     | 100  | 10.0                                       | 1.0                  | 9.0                    | 20.0                            | 7.0                                    | 0.0                           | 500.0           | 0.01            | 0.0     |

| Population name   | Size     | Resting threshold (mV) | THO variability (mV) | Membrane time constant | Post-spike increase in $G_{K+}$ | Post-spike $G_{K+}$ time constant (ms) | Adaptation threshold increase | Adaptation (ms) | Noise amplitude | DC (mV) |
|-------------------|----------|------------------------|----------------------|------------------------|---------------------------------|----------------------------------------|-------------------------------|-----------------|-----------------|---------|
|                   | <i>N</i> | <i>THO</i>             |                      | <i>TMEM</i>            | <i>B</i>                        | <i>TGK</i>                             | <i>C</i>                      | <i>TTH</i>      |                 |         |
| > + Baro Raphe 28 | 100      | 10.0                   | 1.0                  | 9.0                    | 20.0                            | 7.0                                    | 0.0                           | 500.0           | 0.1             | 0.0     |
| + Baro Raphe 29   | 100      | 10.0                   | 1.0                  | 9.0                    | 20.0                            | 7.0                                    | 0.0                           | 500.0           | 0.5             | 0.0     |
| + Baro Raphe 30   | 100      | 10.0                   | 1.0                  | 9.0                    | 20.0                            | 7.0                                    | 0.0                           | 500.0           | 0.5             | 0.0     |
| + Baro Raphe 31   | 100      | 10.0                   | 1.0                  | 9.0                    | 20.0                            | 7.0                                    | 0.0                           | 500.0           | 0.1             | 10.0    |
| + Baro Raphe 32   | 100      | 10.0                   | 1.0                  | 9.0                    | 20.0                            | 7.0                                    | 0.0                           | 500.0           | 0.1             | 10.0    |

4

5 Variable names used by MacGregor (1987) are in italics. All values representing voltages are relative to the resting potential, which is considered  
6 equal to zero. *N* is the number of neurons simulated in each population. *THO*, the resting threshold, is normally distributed in the population  
7 around the value of THO with a standard deviation equal to the “THO variability” value. *TMEM* is the membrane time constant. *B* is the  
8 amplitude of the post-spike increase in potassium conductance. *TGK* is the time constant of the potassium conductance decay following an action  
9 potential. *C* and *TTH* define the change in threshold associated with spike adaptation. *C* is the ratio of the threshold increase to the membrane  
10 potential increase; its value is between 0 and 1. *TTH* is the time constant of the rise in threshold with spike adaptation. *Noise Amplitude*: Each  
11 cell has an internal noise generator that acts like two synapses, one with an equilibrium potential of 70 mV above resting and the other with -70  
12 mV. Each acts like it has an incoming firing probability of 0.05 per time step, and a synapse time constant of 1.5 ms. This parameter is the  
13 conductance that gets added to the synapse conductance on each (virtual) spike. *DC*: An injected current will raise the membrane potential by an  
14 amount that is inversely proportional to the membrane conductance. Instead of being specified directly as a current, this parameter is specified in  
15 mV, and it is interpreted as the current that is required to raise the membrane potential by the specified number of mV when the membrane  
16 conductance has its resting value. The effect on the membrane potential at other membrane conductances will be inversely proportional to the  
17 conductance. Note also that as in other types of IF neuron models, our neuron models do not actually generate action potential-like spikes but  
18 only identified moments of spikes, so “spiking” shown in all neuron simulations are represented graphically by assigning vertical spike-like lines  
19 at computed times of threshold crossing. Hypoxia neurons were not used and the population “E-Aug-Late-HT” in Rybak et al. 2008 has been  
20 renamed to “E-AUG-Cough” in the base model for this simulation. (>) neuron populations that relay perturbations of the network model. A fiber  
21 population consisting of 100 fibers, each with 100 excitatory synaptic terminals with a synaptic strength of 0.02 was used to represent cough  
22 receptor excitation; each fiber had a firing probability of 0.05 at each simulation time step. This fiber population excited a second-order “Cough”  
23 neuron population. A fiber population consisting of 100 fibers, each with 100 excitatory synaptic terminals with a synaptic strength of 0.01 was  
24 used to represent baroreceptor excitation; each fiber had a firing probability of 0.05 at each simulation time step. This fiber population excited the  
25 “Baro Raphé 8” and “Baro Raphé 28” neuron populations. For abbreviations see list of abbreviations and legend of figure 1 in the main text.

26

27 **Table S2. I-Driver neuron parameters.**

| I-Driver Parameter            | Value    |
|-------------------------------|----------|
| Time constant for $h$         | 2000 ms  |
| Half-voltage for $h$          | -51 mV   |
| NaP conductance               | 3.0 nS   |
| Slope for $h$                 | 5.0 mV   |
| Half-voltage for activation   | -43.0 mV |
| Slope for activation          | -6.0 mV  |
| Reset voltage @ $h = 0$       | -42.0 mV |
| Threshold voltage             | -37.0 mV |
| Applied current ( $I_{app}$ ) | 0.0 pA   |
| Noise amplitude               | 0.1 nS   |

28

29 The I-Driver neuron was modeled using the “hybrid IF conditional burster model” derived from Breen et al. (2003). All parameters in this model  
 30 correspond to the Breen et al. model;  $h$  is the inactivation variable of the persistent sodium (NaP) channel. The following modifications of the  
 31 original Breen et al. model were made: the *Threshold voltage* parameter was set constant (not dependent on  $h$ ) and reset of  $h$  with each spike  $\Delta h$   
 32 ( $h$ ) = -0.00185 $h$ .  
 33

34 **Table S3. Simulated PSR population parameters for model networks.**

35

| PSR Population Parameter | Value    |
|--------------------------|----------|
| Rise time constant       | 500.0 ms |
| Fall time constant       | 100.0 ms |

36

37 Lung volume dynamics were not directly simulated in our model. Input to the PSR population was formed via low-pass filtering of the output of  
 38 the Phr population or I-Aug-BS/Phr population with rise and fall time constants given in the table.

39

40 **Table S4. Connectivity for the network model modified from Rybak et al. 2008.**

41

42

| Source Population | Target Population | Synaptic Type | Conduction Times |      | No. of Terminals | Synaptic Strength | Source Population N | Target Population N | Divergence    | Mean No. of Terminals | Convergence   |
|-------------------|-------------------|---------------|------------------|------|------------------|-------------------|---------------------|---------------------|---------------|-----------------------|---------------|
|                   |                   |               | Min.             | Max. |                  |                   |                     |                     |               |                       |               |
| I-DRIVER          | I-DEC             | Ex_1          | 0                | 4    | 100              | 0.006             | 300                 | 300                 | 84.99 ± 3.14  | 1.18                  | 84.99 ± 7.54  |
| I-DRIVER          | I-AUG             | Ex_1          | 0                | 5    | 100              | 0.005             | 300                 | 300                 | 84.98 ± 3.14  | 1.18                  | 84.98 ± 7.44  |
| I-DRIVER          | I-DRIVER          | Ex_1          | 0                | 4    | 50               | 0.003             | 300                 | 300                 | 46.34 ± 1.76  | 1.08                  | 46.34 ± 5.84  |
| E-DEC-P           | I-DRIVER          | Inh_2         | 0                | 5    | 100              | 0.015             | 300                 | 300                 | 85.2 ± 3.05   | 1.17                  | 85.20 ± 9.59  |
| E-DEC-P           | E-AUG-early       | Inh_1         | 0                | 2    | 150              | 0.012             | 300                 | 300                 | 118.24 ± 4.01 | 1.27                  | 118.24 ± 8.86 |
| E-DEC-P           | E-AUG-late        | Inh_1         | 2                | 4    | 150              | 0.02              | 300                 | 300                 | 118.1 ± 3.94  | 1.27                  | 118.10 ± 9.61 |
| E-DEC-P           | VRC IE            | Inh_1         | 0                | 2    | 50               | 0.1               | 300                 | 99                  | 39.33 ± 2.31  | 1.27                  | 119.18 ± 7.22 |
| E-DEC-P           | I-DEC             | Inh_1         | 0                | 2    | 200              | 0.2               | 300                 | 300                 | 146.07 ± 4.42 | 1.37                  | 146.07 ± 8.71 |
| E-DEC-P           | E-AUG BS          | Inh_1         | 0                | 4    | 100              | 0.01              | 300                 | 300                 | 85.51 ± 3.01  | 1.17                  | 85.51 ± 7.16  |
| E-DEC-P           | I-AUG             | Inh_1         | 0                | 2    | 50               | 0.1               | 300                 | 300                 | 46.19 ± 1.72  | 1.08                  | 46.19 ± 5.43  |
| E-DEC-P           | PRG rIE           | Ex_1          | 2                | 4    | 100              | 0.001             | 300                 | 100                 | 63.13 ± 2.98  | 1.58                  | 189.39 ± 6.74 |
| E-DEC-P           | PRG cIE           | Ex_1          | 2                | 4    | 100              | 0.001             | 300                 | 100                 | 63.23 ± 3.19  | 1.58                  | 189.70 ± 9.56 |
| I-DEC             | E-AUG-early       | Inh_1         | 0                | 2    | 115              | 1.0               | 300                 | 300                 | 95.67 ± 3.39  | 1.20                  | 95.67 ± 7.14  |
| I-DEC             | E-DEC-P           | Inh_1         | 0                | 5    | 200              | 0.2               | 300                 | 300                 | 145.80 ± 5.20 | 1.37                  | 145.80 ± 9.31 |
| I-DEC             | I-AUG             | Inh_2         | 0                | 1    | 200              | 0.008             | 300                 | 300                 | 146.63 ± 4.89 | 1.36                  | 146.63 ± 8.54 |
| I-DEC             | E-AUG-late        | Inh_2         | 0                | 5    | 115              | 1.0               | 300                 | 300                 | 95.71 ± 3.51  | 1.20                  | 95.71 ± 7.84  |
| I-DEC             | VRC IE            | Inh_1         | 0                | 4    | 100              | 0.029             | 300                 | 99                  | 63.21 ± 3.10  | 1.58                  | 191.54 ± 7.38 |
| I-DEC             | E-DEC-T           | Inh_1         | 0                | 5    | 100              | 0.05              | 300                 | 300                 | 84.9 ± 2.96   | 1.18                  | 84.90 ± 9.43  |
| I-DEC             | ILM               | Ex_1          | 0                | 3    | 50               | 0.004             | 300                 | 300                 | 46.35 ± 1.71  | 1.08                  | 46.35 ± 6.00  |
| I-DEC             | E-AUG BS          | Inh_1         | 0                | 4    | 100              | 0.02              | 300                 | 300                 | 85.44 ± 3.02  | 1.17                  | 85.44 ± 9.96  |
| I-DEC             | PRG EI            | Ex_1          | 2                | 4    | 100              | 0.001             | 300                 | 100                 | 63.33 ± 3.16  | 1.58                  | 190.00 ± 8.78 |
| I-DEC             | PRG I             | Ex_1          | 2                | 4    | 100              | 0.0005            | 300                 | 100                 | 63.5 ± 3.23   | 1.57                  | 190.51 ± 8.03 |
| I-DEC             | PRG I             | Inh_2         | 2                | 4    | 100              | 0.0005            | 300                 | 100                 | 63.66 ± 3.21  | 1.57                  | 190.98 ± 8.42 |
| I-DEC             | PRG rIE           | Inh_1         | 2                | 4    | 100              | 0.0001            | 300                 | 100                 | 63.55 ± 3.04  | 1.57                  | 190.65 ± 8.05 |
| I-DEC             | PRG cIE           | Inh_2         | 2                | 4    | 100              | 0.0001            | 300                 | 100                 | 63.27 ± 3.06  | 1.58                  | 189.80 ± 8.43 |
| + I-DEC           | LUM (EXP MN)      | Inh_1         | 0                | 4    | 100              | 0.1               | 300                 | 300                 | 84.96 ± 3.06  | 1.18                  | 84.96 ± 8.23  |
| + I-DEC           | E-Dec-Pre         | Inh_1         | 0                | 5    | 200              | 0.2               | 300                 | 300                 | 146.12 ± 4.70 | 1.37                  | 146.12 ± 8.41 |
| I-AUG             | I-AUG             | Ex_1          | 0                | 5    | 50               | 0.02              | 300                 | 300                 | 45.99 ± 1.77  | 1.09                  | 45.99 ± 5.31  |
| I-AUG             | PRG cIE           | Inh_2         | 2                | 4    | 100              | 0.0001            | 300                 | 100                 | 63.43 ± 3.19  | 1.58                  | 190.28 ± 9.05 |

| Source Population | Target Population | Synaptic Type | Conduction |      | No. of Terminals | Synaptic Strength | Source Population N | Target Population N | Divergence    | Mean No. of Terminals | Convergence   |
|-------------------|-------------------|---------------|------------|------|------------------|-------------------|---------------------|---------------------|---------------|-----------------------|---------------|
|                   |                   |               | Times Min. | Max. |                  |                   |                     |                     |               |                       |               |
| I-AUG             | I-AUG BS/Phrenic  | Ex_1          | 0          | 3    | 200              | 0.06              | 300                 | 300                 | 146.05 ± 4.72 | 1.37                  | 146.05 ± 9.65 |
| I-AUG             | ILM               | Ex_1          | 0          | 3    | 50               | 0.03              | 300                 | 300                 | 46.35 ± 1.71  | 1.08                  | 46.35 ± 6.00  |
| I-AUG             | VRC IE            | Ex_1          | 0          | 5    | 100              | 0.003             | 300                 | 99                  | 63.05 ± 3.25  | 1.59                  | 191.06 ± 7.37 |
| I-AUG             | PRG I             | Ex_1          | 2          | 4    | 100              | 0.0025            | 300                 | 100                 | 63.59 ± 2.94  | 1.57                  | 190.76 ± 7.71 |
| I-AUG             | PRG rIE           | Inh_1         | 2          | 4    | 100              | 0.0001            | 300                 | 100                 | 63.43 ± 2.95  | 1.58                  | 190.29 ± 8.57 |
| I-AUG             | E-AUG BS          | Inh_1         | 0          | 4    | 1000             | 0.1               | 300                 | 300                 | 289.42 ± 2.98 | 3.46                  | 289.42 ± 2.86 |
| + I-AUG           | LUM (EXP MN)      | Inh_1         | 0          | 4    | 100              | 0.1               | 300                 | 300                 | 85.08 ± 3.20  | 1.18                  | 85.08 ± 7.10  |
| E-AUG-early       | E-DEC-P           | Inh_1         | 0          | 2    | 110              | 0.014             | 300                 | 300                 | 91.85 ± 3.43  | 1.20                  | 91.85 ± 8.07  |
| E-AUG-early       | I-DEC             | Inh_1         | 0          | 5    | 100              | 0.06              | 300                 | 300                 | 85.13 ± 2.98  | 1.17                  | 85.13 ± 7.70  |
| E-AUG-early       | I-AUG             | Inh_1         | 0          | 2    | 150              | 0.06              | 300                 | 300                 | 118.48 ± 4.08 | 1.27                  | 118.48 ± 8.37 |
| E-AUG-early       | VRC IE            | Inh_1         | 0          | 2    | 24               | 0.05              | 300                 | 99                  | 21.46 ± 1.29  | 1.12                  | 65.02 ± 6.96  |
| E-AUG-early       | I-AUG BS/Phrenic  | Inh_1         | 0          | 2    | 150              | 0.001             | 300                 | 300                 | 118.31 ± 4.21 | 1.27                  | 118.31 ± 7.57 |
| E-AUG-early       | E-DEC-T           | Inh_1         | 0          | 2    | 100              | 0.05              | 300                 | 300                 | 85.13 ± 2.94  | 1.17                  | 85.13 ± 9.11  |
| E-AUG-early       | E-AUG-late        | Inh_1         | 0          | 2    | 50               | 0.001             | 300                 | 300                 | 46.01 ± 1.81  | 1.09                  | 46.01 ± 6.57  |
| + E-AUG-early     | E-Dec-Pre         | Inh_1         | 0          | 2    | 110              | 0.014             | 300                 | 300                 | 92.51 ± 3.15  | 1.19                  | 92.51 ± 8.03  |
| E-AUG-early       | PRG E             | Ex_1          | 2          | 4    | 100              | 0.002             | 300                 | 100                 | 63.08 ± 2.85  | 1.59                  | 189.25 ± 7.68 |
| E-AUG-early       | E-AUG BS          | Ex_1          | 0          | 3    | 50               | 0.02              | 300                 | 300                 | 46.35 ± 1.71  | 1.08                  | 46.35 ± 6.00  |
| E-AUG-early       | PRG I             | Inh_2         | 2          | 4    | 100              | 0.0005            | 300                 | 100                 | 63.08 ± 2.85  | 1.59                  | 189.25 ± 7.68 |
| E-AUG-late        | E-AUG-early       | Inh_1         | 0          | 2    | 200              | 0.04              | 300                 | 300                 | 145.91 ± 4.71 | 1.37                  | 145.91 ± 9.07 |
| E-AUG-late        | I-DEC             | Inh_1         | 0          | 4    | 55               | 0.01              | 300                 | 300                 | 50.33 ± 1.87  | 1.09                  | 50.33 ± 6.68  |
| E-AUG-late        | I-AUG             | Inh_1         | 0          | 2    | 150              | 0.06              | 300                 | 300                 | 118.09 ± 3.79 | 1.27                  | 118.09 ± 7.65 |
| E-AUG-late        | E-DEC-P           | Inh_1         | 0          | 2    | 115              | 0.014             | 300                 | 300                 | 95.57 ± 3.26  | 1.20                  | 95.57 ± 9.85  |
| E-AUG-late        | I-AUG BS/Phrenic  | Inh_1         | 0          | 2    | 150              | 0.002             | 300                 | 300                 | 118.14 ± 4.18 | 1.27                  | 118.14 ± 8.44 |
| E-AUG-late        | VRC IE            | Inh_1         | 0          | 2    | 24               | 0.02              | 300                 | 99                  | 21.32 ± 1.39  | 1.13                  | 64.62 ± 7.03  |
| E-AUG-late        | E-DEC-T           | Inh_1         | 0          | 2    | 100              | 0.05              | 300                 | 300                 | 85.18 ± 3.01  | 1.17                  | 85.18 ± 6.53  |
| E-AUG-late        | E-AUG BS          | Inh_1         | 0          | 4    | 100              | 0.015             | 300                 | 300                 | 85.16 ± 3.38  | 1.17                  | 85.16 ± 10.32 |
| E-AUG-late        | E-AUG-Cough       | Ex_1          | 0          | 3    | 50               | 0.01              | 300                 | 300                 | 45.99 ± 1.70  | 1.09                  | 45.99 ± 6.08  |
| + E-AUG-late      | E-Dec-Pre         | Inh_1         | 0          | 2    | 115              | 0.04              | 300                 | 300                 | 95.69 ± 3.35  | 1.20                  | 95.69 ± 7.07  |
| E-AUG-late        | ELM               | Inh_1         | 2          | 4    | 500              | 0.12              | 300                 | 300                 | 243.18 ± 5.04 | 2.06                  | 243.18 ± 7.13 |
| VRC IE            | I-DEC             | Inh_2         | 0          | 4    | 200              | 0.05              | 99                  | 300                 | 146.65 ± 4.99 | 1.36                  | 48.39 ± 5.40  |
| VRC IE            | I-AUG             | Inh_2         | 0          | 5    | 200              | 0.02              | 99                  | 300                 | 146.07 ± 4.45 | 1.37                  | 48.20 ± 4.92  |
| I-AUG BS/Phrenic  | LUNG PSRs         | Ex_1          | 0          | 3    | 100              | 0.016             | 300                 | 300                 | 84.91 ± 3.04  | 1.18                  | 84.91 ± 8.03  |
| NRM BötC          | PRG rIE           | Inh_2         | 0          | 1    | 100              | 0.002             | 300                 | 100                 | 63.41 ± 3.22  | 1.58                  | 190.23 ± 7.92 |
| NRM BötC          | PRG cIE           | Inh_2         | 0          | 1    | 100              | 0.002             | 300                 | 100                 | 63.37 ± 3.02  | 1.58                  | 190.12 ± 7.75 |

| Source Population | Target Population                  | Synaptic Type | Conduction |      | No. of Terminals | Synaptic Strength | Source Population N | Target Population N | Divergence    | Mean No. of Terminals | Convergence    |
|-------------------|------------------------------------|---------------|------------|------|------------------|-------------------|---------------------|---------------------|---------------|-----------------------|----------------|
|                   |                                    |               | Times Min. | Max. |                  |                   |                     |                     |               |                       |                |
| NRM BötC          | PRG I                              | Ex_1          | 0          | 1    | 100              | 0.002             | 300                 | 100                 | 63.25 ± 3.00  | 1.58                  | 189.74 ± 8.31  |
| E-AUG-Cough       | E-AUG BS                           | Inh_1         | 0          | 3    | 600              | 0.1               | 300                 | 300                 | 259.67 ± 4.67 | 2.31                  | 259.67 ± 5.85  |
| + E-AUG-Cough     | LUM (EXP MN)                       | Inh_1         | 0          | 4    | 500              | 0.1               | 300                 | 300                 | 243.68 ± 5.27 | 2.05                  | 243.68 ± 6.90  |
| + E-AUG-Cough     | ELM                                | Inh_1         | 0          | 3    | 600              | 0.25              | 300                 | 300                 | 259.29 ± 4.63 | 2.31                  | 259.29 ± 5.84  |
| + E-AUG-Cough     | E-Dec-Pre                          | Inh_1         | 0          | 3    | 600              | 0.25              | 300                 | 300                 | 259.38 ± 4.97 | 2.31                  | 259.38 ± 6.01  |
| LUNG PSRs         | Pump+                              | Ex_1          | 0          | 3    | 50               | 0.015             | 300                 | 300                 | 46.11 ± 1.76  | 1.08                  | 46.11 ± 6.15   |
| LUNG PSRs         | Pump-                              | Ex_1          | 0          | 3    | 50               | 0.015             | 300                 | 300                 | 46.23 ± 1.78  | 1.08                  | 46.23 ± 9.43   |
| PRG cIE           | I-DRIVER                           | Ex_1          | 0          | 5    | 100              | 0.001             | 100                 | 300                 | 85.68 ± 2.78  | 1.17                  | 28.56 ± 4.45   |
| Pump-             | PRG E                              | Pre           | 0          | 4    | 100              | 0.99              | 300                 | 100                 | 63.19 ± 2.88  | 1.58                  | 189.58 ± 7.28  |
| + Pump-           | Second-order (deflation sensitive) | Inh_1         | 0          | 4    | 100              | 0.02              | 300                 | 300                 | 85.21 ± 2.99  | 1.17                  | 85.21 ± 6.50   |
| Pump-             | I-DEC                              | Inh_1         | 0          | 2    | 25               | 0.0035            | 300                 | 300                 | 23.98 ± 0.90  | 1.04                  | 23.98 ± 5.97   |
| Pump-             | PRG I                              | Pre           | 0          | 4    | 100              | 0.99              | 300                 | 100                 | 63.53 ± 2.94  | 1.57                  | 190.58 ± 7.02  |
| Pump-             | PRG EI                             | Pre           | 2          | 4    | 100              | 0.99              | 300                 | 100                 | 63.55 ± 2.95  | 1.57                  | 190.64 ± 7.44  |
| Pump-             | PRG rIE                            | Pre           | 0          | 4    | 100              | 0.99              | 300                 | 100                 | 63.63 ± 3.02  | 1.57                  | 190.88 ± 9.09  |
| Pump-             | PRG cIE                            | Pre           | 0          | 4    | 100              | 0.99              | 300                 | 100                 | 63.63 ± 3.02  | 1.57                  | 190.88 ± 9.09  |
| Pump+             | E-DEC-P                            | Ex_1          | 0          | 2    | 100              | 0.01              | 300                 | 300                 | 85.47 ± 2.95  | 1.17                  | 85.47 ± 8.14   |
| Pump+             | VRC IE                             | Ex_1          | 0          | 2    | 100              | 0.004             | 300                 | 99                  | 63.10 ± 2.99  | 1.58                  | 191.2 ± 11.2   |
| Pump+             | I-AUG                              | Ex_1          | 0          | 2    | 25               | 0.002             | 300                 | 300                 | 24.07 ± 0.91  | 1.04                  | 24.07 ± 4.15   |
| Pump+             | E-DEC-T                            | Ex_1          | 0          | 2    | 100              | 0.002             | 300                 | 300                 | 85.12 ± 3.16  | 1.17                  | 85.12 ± 6.94   |
| Pump+             | E-AUG BS                           | Ex_1          | 0          | 4    | 100              | 0.008             | 300                 | 300                 | 85.19 ± 3.15  | 1.17                  | 85.19 ± 7.24   |
| + E-DEC-T         | Baro Raphé 29                      | Inh_1         | 0          | 3    | 100              | 0.001             | 300                 | 100                 | 63.59 ± 3.05  | 1.57                  | 190.76 ± 7.20  |
| E-DEC-T           | I-AUG BS/Phrenic                   | Inh_1         | 0          | 4    | 100              | 0.05              | 300                 | 300                 | 84.99 ± 3.14  | 1.18                  | 84.99 ± 7.54   |
| E-DEC-T           | PRG rIE                            | Ex_1          | 2          | 4    | 100              | 0.001             | 300                 | 100                 | 63.26 ± 3.11  | 1.58                  | 189.77 ± 11.78 |
| E-DEC-T           | PRG I                              | Ex_1          | 2          | 4    | 100              | 0.0005            | 300                 | 100                 | 63.33 ± 3.02  | 1.58                  | 189.98 ± 9.72  |
| E-DEC-T           | PRG I                              | Inh_2         | 2          | 4    | 100              | 0.0005            | 300                 | 100                 | 63.20 ± 3.13  | 1.58                  | 189.60 ± 7.79  |
| E-DEC-T           | PRG rIE                            | Inh_1         | 2          | 4    | 100              | 0.0005            | 300                 | 100                 | 63.57 ± 3.16  | 1.57                  | 190.70 ± 7.57  |
| E-DEC-T           | PRG cIE                            | Ex_1          | 2          | 4    | 100              | 0.001             | 300                 | 100                 | 63.20 ± 3.18  | 1.58                  | 189.61 ± 7.72  |
| E-DEC-T           | PRG cIE                            | Inh_2         | 2          | 4    | 100              | 0.0005            | 300                 | 100                 | 63.40 ± 3.17  | 1.58                  | 190.20 ± 9.74  |
| + E-DEC-T         | E-AUG BS                           | Inh_1         | 0          | 4    | 100              | 0.05              | 300                 | 300                 | 85.16 ± 3.08  | 1.17                  | 85.16 ± 8.54   |
| + E-DEC-T         | ELM                                | Inh_1         | 0          | 4    | 100              | 0.04              | 300                 | 300                 | 85.04 ± 3.30  | 1.18                  | 85.04 ± 8.24   |
| + E-DEC-T         | I-AUG                              | Inh_1         | 0          | 4    | 100              | 0.0075            | 300                 | 300                 | 85.12 ± 3.35  | 1.17                  | 85.12 ± 8.17   |
| PRG rIE           | PRG EI                             | Inh_1         | 2          | 4    | 100              | 0.03              | 100                 | 100                 | 63.79 ± 3.24  | 1.57                  | 63.79 ± 4.98   |
| PRG rIE           | VRC IE                             | Ex_1          | 0          | 1    | 100              | 0.001             | 100                 | 99                  | 62.90 ± 3.28  | 1.59                  | 63.54 ± 4.65   |

| Source Population        | Target Population | Synaptic Type | Conduction |      | No. of Terminals | Synaptic Strength | Source Population N | Target Population N | Divergence    | Mean No. of Terminals | Convergence   |
|--------------------------|-------------------|---------------|------------|------|------------------|-------------------|---------------------|---------------------|---------------|-----------------------|---------------|
|                          |                   |               | Times Min. | Max. |                  |                   |                     |                     |               |                       |               |
| PRG rIE                  | E-DEC-P           | Ex_1          | 0          | 5    | 100              | 0.02              | 100                 | 300                 | 85.06 ± 2.76  | 1.18                  | 28.35 ± 4.15  |
| PRG EI                   | PRG rIE           | Ex_1          | 2          | 4    | 100              | 0.002             | 100                 | 100                 | 63.47 ± 3.20  | 1.58                  | 63.47 ± 4.78  |
| PRG EI                   | PRG cIE           | Ex_1          | 2          | 4    | 100              | 0.002             | 100                 | 100                 | 63.36 ± 3.47  | 1.58                  | 63.36 ± 4.41  |
| PRG EI                   | VRC IE            | Ex_1          | 0          | 4    | 50               | 0.0003            | 100                 | 99                  | 39.46 ± 2.35  | 1.27                  | 39.86 ± 5.11  |
| PRG EI                   | E-DEC-T           | Ex_1          | 0          | 4    | 100              | 0.01              | 100                 | 300                 | 85.16 ± 3.33  | 1.17                  | 28.39 ± 5.10  |
| + E-Dec-Pre              | ELM               | Ex_1          | 2          | 4    | 150              | 0.0075            | 300                 | 300                 | 118.11 ± 3.99 | 1.27                  | 118.11 ± 7.38 |
| > + Baro Raphé 8         | Baro Raphé 29     | Ex_1          | 0          | 3    | 50               | 0.0125            | 100                 | 100                 | 39.73 ± 2.28  | 1.26                  | 39.73 ± 5.01  |
| > + Baro Raphé 8         | Baro Raphé 30     | Ex_1          | 0          | 3    | 50               | 0.0125            | 100                 | 100                 | 39.51 ± 2.47  | 1.27                  | 39.51 ± 4.93  |
| > + Baro Raphé 28        | Baro Raphé 31     | Inh_1         | 0          | 3    | 50               | 0.005             | 100                 | 100                 | 39.38 ± 2.09  | 1.27                  | 39.38 ± 6.21  |
| > + Baro Raphé 28        | Baro Raphé 32     | Inh_1         | 0          | 3    | 50               | 0.005             | 100                 | 100                 | 39.51 ± 2.47  | 1.27                  | 39.51 ± 4.93  |
| > + Baro Raphé 28        | E-AUG BS          | Inh_4         | 0          | 3    | 400              | 0.04              | 100                 | 300                 | 221.45 ± 4.77 | 1.81                  | 73.82 ± 4.47  |
| + Baro Raphé 29          | Baro Raphé 30     | Ex_1          | 0          | 3    | 50               | 0.01              | 100                 | 100                 | 39.51 ± 2.47  | 1.27                  | 39.51 ± 4.93  |
| + Baro Raphé 29          | E-DEC-T           | Ex_3          | 0          | 3    | 100              | 0.12              | 100                 | 300                 | 84.74 ± 3.12  | 1.18                  | 28.25 ± 4.23  |
| + Baro Raphé 29          | E-DEC-P           | Ex_3          | 0          | 3    | 100              | 0.2               | 100                 | 300                 | 84.74 ± 3.12  | 1.18                  | 28.25 ± 4.23  |
| + Baro Raphé 30          | Baro Raphé 29     | Inh_1         | 0          | 3    | 50               | 0.01              | 100                 | 100                 | 39.51 ± 2.47  | 1.27                  | 39.51 ± 4.93  |
| + Baro Raphé 32          | Baro Raphé 31     | Inh_1         | 0          | 3    | 50               | 0.005             | 100                 | 100                 | 39.51 ± 2.47  | 1.27                  | 39.51 ± 4.93  |
| + Baro Raphé 32          | E-DEC-T           | Inh_4         | 0          | 3    | 100              | 0.01              | 100                 | 300                 | 85.28 ± 3.13  | 1.17                  | 28.43 ± 4.65  |
| + Baro Raphé 32          | E-DEC-P           | Inh_4         | 0          | 3    | 100              | 0.01              | 100                 | 300                 | 84.74 ± 3.12  | 1.18                  | 28.25 ± 4.23  |
| + Baro Raphé 32          | E-Dec-Pre         | Inh_4         | 0          | 3    | 100              | 0.01              | 100                 | 300                 | 84.74 ± 2.97  | 1.18                  | 28.25 ± 4.67  |
| > Second order (cough)   | I-DEC             | Ex_1          | 0          | 3    | 100              | 0.038             | 100                 | 300                 | 85.25 ± 2.83  | 1.17                  | 28.42 ± 5.15  |
| > Second order (cough)   | I-AUG             | Ex_1          | 0          | 3    | 100              | 0.02              | 100                 | 300                 | 85.25 ± 2.83  | 1.17                  | 28.42 ± 5.15  |
| > Second order (cough)   | E-DEC-P           | Ex_1          | 0          | 3    | 100              | 0.015             | 100                 | 300                 | 85.25 ± 2.83  | 1.17                  | 28.42 ± 5.15  |
| > Second order (cough)   | E-AUG-early       | Ex_1          | 0          | 3    | 100              | 0.1               | 100                 | 300                 | 85.25 ± 2.83  | 1.17                  | 28.42 ± 5.15  |
| > Second order (cough)   | E-AUG-late        | Ex_1          | 0          | 3    | 100              | 0.06              | 100                 | 300                 | 85.25 ± 2.83  | 1.17                  | 28.42 ± 5.15  |
| > Second order (cough)   | E-AUG BS          | Ex_1          | 0          | 4    | 125              | 0.001             | 100                 | 300                 | 102.81 ± 3.59 | 1.22                  | 34.27 ± 4.61  |
| > Second order (cough)   | Pump-             | Inh_1         | 0          | 4    | 250              | 0.4               | 100                 | 300                 | 170.45 ± 4.98 | 1.47                  | 56.82 ± 4.58  |
| > Second order (cough)   | VRC IE            | Inh_1         | 0          | 3    | 100              | 0.2               | 100                 | 99                  | 63.13 ± 3.05  | 1.58                  | 63.77 ± 5.20  |
| > Second order (cough)   | PRG cIE           | Ex_1          | 0          | 3    | 100              | 0.001             | 100                 | 100                 | 63.59 ± 3.21  | 1.57                  | 63.59 ± 5.84  |
| > Second order (cough)   | PRG rIE           | Ex_1          | 0          | 3    | 100              | 0.001             | 100                 | 100                 | 63.59 ± 3.21  | 1.57                  | 63.59 ± 5.84  |
| > Second order (cough)   | PRG I             | Ex_1          | 0          | 3    | 100              | 0.001             | 100                 | 100                 | 63.59 ± 3.21  | 1.57                  | 63.59 ± 5.84  |
| > Second order (cough)   | PRG E             | Ex_1          | 0          | 3    | 100              | 0.001             | 100                 | 100                 | 63.59 ± 3.21  | 1.57                  | 63.59 ± 5.84  |
| > Second order (cough)   | PRG EI            | Ex_1          | 0          | 3    | 100              | 0.001             | 100                 | 100                 | 63.59 ± 3.21  | 1.57                  | 63.59 ± 5.84  |
| > + Second order (cough) | E-Dec-Pre         | Ex_1          | 0          | 3    | 100              | 0.0025            | 100                 | 300                 | 85.14 ± 3.06  | 1.17                  | 28.38 ± 3.97  |
| PRG E                    | PRG rIE           | Inh_1         | 2          | 4    | 100              | 0.0001            | 100                 | 100                 | 63.17 ± 3.15  | 1.58                  | 63.17 ± 5.22  |

| Source Population                    | Target Population | Synaptic Type | Conduction Times |      | No. of Terminals | Synaptic Strength | Source Population N | Target Population N | Divergence   | Mean No. of Terminals | Convergence  |
|--------------------------------------|-------------------|---------------|------------------|------|------------------|-------------------|---------------------|---------------------|--------------|-----------------------|--------------|
|                                      |                   |               | Min.             | Max. |                  |                   |                     |                     |              |                       |              |
| PRG E                                | PRG cIE           | Inh_1         | 2                | 4    | 100              | 0.0001            | 100                 | 100                 | 63.47 ± 3.13 | 1.58                  | 63.47 ± 5.60 |
| PRG E                                | I-DEC             | Inh_1         | 0                | 1    | 100              | 0.008             | 100                 | 300                 | 85.14 ± 3.03 | 1.17                  | 28.38 ± 4.11 |
| PRG NRM                              | PRG I             | Ex_1          | 0                | 4    | 100              | 0.015             | 100                 | 100                 | 63.26 ± 3.28 | 1.58                  | 63.26 ± 4.40 |
| PRG NRM                              | PRG I             | Inh_1         | 0                | 4    | 100              | 0.05              | 100                 | 100                 | 63.62 ± 3.11 | 1.57                  | 63.62 ± 4.61 |
| PRG NRM                              | I-DRIVER          | Ex_1          | 0                | 5    | 100              | 0.12              | 100                 | 300                 | 85.10 ± 3.00 | 1.18                  | 28.37 ± 4.51 |
| PRG NRM                              | VRC IE            | Ex_1          | 0                | 1    | 100              | 0.01              | 100                 | 99                  | 63.02 ± 2.53 | 1.59                  | 63.66 ± 4.67 |
| PRG NRM                              | I-AUG             | Ex_1          | 0                | 1    | 100              | 0.01              | 100                 | 300                 | 85.21 ± 2.94 | 1.17                  | 28.40 ± 4.81 |
| PRG NRM                              | E-AUG-early       | Ex_1          | 0                | 4    | 100              | 0.025             | 100                 | 300                 | 85.82 ± 3.10 | 1.17                  | 28.61 ± 4.20 |
| PRG NRM                              | E-AUG-late        | Ex_1          | 0                | 4    | 50               | 0.003             | 100                 | 300                 | 45.82 ± 1.89 | 1.09                  | 12.27 ± 3.67 |
| PRG NRM                              | E-DEC-P           | Ex_1          | 0                | 1    | 100              | 0.01              | 100                 | 300                 | 84.87 ± 3.22 | 1.18                  | 28.29 ± 4.18 |
| PRG NRM                              | E-DEC-T           | Ex_1          | 0                | 1    | 100              | 0.1               | 100                 | 300                 | 85.35 ± 3.04 | 1.17                  | 28.45 ± 4.06 |
| PRG NRM                              | NRM BötC          | Inh_1         | 0                | 1    | 100              | 0.001             | 100                 | 300                 | 85.11 ± 2.96 | 1.17                  | 28.37 ± 5.07 |
| + PRG NRM                            | E-Dec-Pre         | Ex_1          | 0                | 1    | 100              | 0.01              | 100                 | 300                 | 85.12 ± 2.61 | 1.17                  | 28.37 ± 4.46 |
| E-AUG BS                             | LUM (EXP MN)      | Ex_1          | 0                | 4    | 100              | 0.03              | 300                 | 300                 | 85.19 ± 3.15 | 1.17                  | 85.19 ± 7.24 |
| PRG I                                | PRG rIE           | Ex_1          | 0                | 4    | 100              | 0.005             | 100                 | 100                 | 62.93 ± 2.89 | 1.59                  | 62.93 ± 5.56 |
| PRG I                                | VRC IE            | Ex_1          | 0                | 5    | 100              | 0.005             | 100                 | 99                  | 63.61 ± 3.41 | 1.57                  | 64.25 ± 4.84 |
| PRG I                                | I-AUG             | Ex_1          | 0                | 4    | 50               | 0.005             | 100                 | 300                 | 46.17 ± 1.67 | 1.08                  | 12.39 ± 3.39 |
| PRG I                                | PRG cIE           | Ex_1          | 0                | 4    | 100              | 0.005             | 100                 | 100                 | 63.67 ± 2.85 | 1.57                  | 63.67 ± 4.57 |
| + Second-order (deflation sensitive) | E-DEC-P           | Inh_1         | 2                | 6    | 100              | 0.04              | 300                 | 300                 | 85.17 ± 3.11 | 1.17                  | 85.17 ± 9.16 |

43

44 (+) connection added to the network in Rybak et al. 2008. (>) connection relaying a perturbation to the network model. Connections between  
45 individual neurons were made according to a sequence of pseudorandom numbers calculated from a unique seed number for each source-to-  
46 target connection. Targets were chosen with replacement. This table includes the means ± SD of the number of neurons in each target population  
47 innervated by each source neuron in each population. Corresponding values are also shown for source neurons that innervated each target neuron  
48 in each population. These data indicate the extent of divergence and convergence, respectively. Most neurons in each source population made a  
49 single terminal connection with each target neuron. *Mean No. of Terminals*, the mean number of terminals from each source neuron innervating  
50 each target neuron. The efficacy of connections between populations of neurons was influenced by the change in conductance associated with  
51 each action potential at a synapse (*Synaptic Strength*) and the number of terminals for each axon. *Synaptic types* were distinguished by their  
52 equilibrium potentials and time constants. The time constant of some synapses was slightly longer than others because troughs in cross-  
53 correlograms from which the particular synaptic connections were inferred tended to have longer durations. Six types of synapses were used in



54 the simulation: type 1 excitatory (Ex\_1, equilibrium potential of 115.0 mV; time constant, 1.5 ms); type 3 excitatory (Ex\_3, equilibrium  
55 potential, 115.0 mV; time constant, 5.0 ms); type 1 inhibitory (Inh\_1, equilibrium potential, -25.0 mV; time constant, 1.5 ms); type 2 inhibitory  
56 (Inh\_2, equilibrium potential, -25.0 mV; time constant, 2.0 ms); type 4 inhibitory (Inh\_4, equilibrium potential, -25.0 mV; time constant, 5.0 ms);  
57 pre-synaptic modulation (Pre, time constant, 1.5 ms). If the value of the pre-synaptic modulatory strength parameter (*Synaptic Strength*) was  
58 <1.0, the strength of the connection it modulates was reduced to the product of the presynaptic Synaptic Strength parameter and target synapse  
59 conductance. If the presynaptic Synaptic Strength parameter was >1.0, the amount by which it was greater than 1 is added to its target synapse's  
60 conductance. *Minimum and maximum conduction times* are expressed in 0.5-ms simulation clock ticks for each source-to-target axon population.  
61 *No. of Terminals*, number of terminals from source neuron.

62  
63  
64  
65  
66
